# Supplementary material for: The known, unknown, and the intriguing about members of a critically endangered traditional medicinal plant genus Aconitum
Source: Front Plant Sci. 2023 Jul 28;14:1139215. doi: 10.3389/fpls.2023.1139215 (PMC10421671; doi:10.3389/fpls.2023.1139215)
Supplement: Supplementary File 1 — Distribution of 227 unique Aconitum spp., and its known 289 subspecies: ploidy and endangerment status [file Table_1.xlsx]

## Sheet: Table S1
S.N.	NAME	SUB SPECIES	NO. OF SUB SPECIES	PLOIDY NUMBER	ENDANGERMENT STATUS	REFERENCES
1	Aconitum aizuense	Nakai	1	32	Not evaluated	http://www.worldfloraonline.org/taxon/wfo-0000516872
2	Aconitum ajanense	Steinb	1	-		https://www.ncbi.nlm.nih.gov/Taxonomy/Browser/wwwtax.cgi?mode=Info&id=1960949&lvl=3&lin=f&keep=1&srchmode=1&unlock
3	Aconitum alboviolaceum	Kom	1	16	Not evaluated	https://www.ncbi.nlm.nih.gov/Taxonomy/Browser/wwwtax.cgi?mode=Info&id=286050&lvl=3&lin=f&keep=1&srchmode=1&unlock
4	Aconitum altaicum	Steinb; glandulosum Rapaics	2	16, 32		http://www.worldfloraonline.org/taxon/wfo-0000516890
5	Aconitum ambiguum	Rchb	1	32		http://www.worldfloraonline.org/taxon/wfo-0000516895
6	Aconitum angustifolium	Bernh ex Rchb	1	20, 48		http://www.worldfloraonline.org/taxon/wfo-0000516907
7	Aconitum anthora	L	1	32	Vulnerable	https://www.ncbi.nlm.nih.gov/Taxonomy/Browser/wwwtax.cgi?mode=Info&id=112588&lvl=3&lin=f&keep=1&srchmode=1&unlock	http://www.phytomorphology.org/aconitum-anthora/
8	Aconitum anthoroideum	DC	1	32		https://www.ncbi.nlm.nih.gov/Taxonomy/Browser/wwwtax.cgi?mode=Info&id=1960950&lvl=3&lin=f&keep=1&srchmode=1&unlock
9	Aconitum apetalum	(Huth) B Fedtsch	1	48		https://www.ncbi.nlm.nih.gov/Taxonomy/Browser/wwwtax.cgi?mode=Info&id=1905852&lvl=3&lin=f&keep=1&srchmode=1&unlock
10	Aconitum artemisiaefolia	Baranov & Skvortsov	1	32		https://www.ncbi.nlm.nih.gov/Taxonomy/Browser/wwwtax.cgi?mode=Info&id=341020&lvl=3&lin=f&keep=1&srchmode=1&unlock
11	Aconitum asahikawaense	Kadota	1	-		https://www.ncbi.nlm.nih.gov/Taxonomy/Browser/wwwtax.cgi?mode=Info&id=1850458&lvl=3&lin=f&keep=1&srchmode=1&unlock
12	Aconitum austrokoreense	Koidz	1	16, 18		https://www.ncbi.nlm.nih.gov/Taxonomy/Browser/wwwtax.cgi?mode=Info&id=85438&lvl=3&lin=f&keep=1&srchmode=1&unlock
13	Aconitum austroyunnanense	W. T. Wang	1	-		https://www.ncbi.nlm.nih.gov/Taxonomy/Browser/wwwtax.cgi?mode=Info&id=632151&lvl=3&lin=f&keep=1&srchmode=1&unlock
14	Aconitum axilliflorum	Vorosch	1	32		http://www.worldfloraonline.org/taxon/wfo-0000516948
15	Aconitum azumiense	Kadota & Hashido	1	32		http://www.worldfloraonline.org/taxon/wfo-0000516950
16	Aconitum baicalense	(Regel) Turcz ex Rapaics	1	16, 32, 48		https://www.ncbi.nlm.nih.gov/Taxonomy/Browser/wwwtax.cgi?mode=Info&id=50863&lvl=3&lin=f&keep=1&srchmode=1&unlock
17	Aconitum balfourii	Stapf	1			https://www.ncbi.nlm.nih.gov/Taxonomy/Browser/wwwtax.cgi?mode=Info&id=279770&lvl=3&lin=f&keep=1&srchmode=1&unlock
18	Aconitum barbatum	var hispidum (DC) Ser; var puberulum Ledeb; Patrin ex Pers	3	16		https://www.ncbi.nlm.nih.gov/Taxonomy/Browser/wwwtax.cgi?mode=Info&id=1045222&lvl=1&p=genome&lin=f&keep=1&srchmode=1&unlock
19	Aconitum bartlettii	var. formosanum (Tamura) T.S.Liu & C.F.Hsieh	1			https://www.ncbi.nlm.nih.gov/Taxonomy/Browser/wwwtax.cgi?mode=Info&id=246708&lvl=3&lin=f&keep=1&srchmode=1&unlock
20	Aconitum berdaui	Zapal	1			https://www.ncbi.nlm.nih.gov/Taxonomy/Browser/wwwtax.cgi?mode=Info&id=1496664&lvl=3&lin=f&keep=1&srchmode=1&unlock
21	Aconitum biflorum	Fisch ex DC	1	32		http://www.worldfloraonline.org/taxon/wfo-0000516982
22	Aconitum brachypodum	Diels	1	16		https://www.ncbi.nlm.nih.gov/Taxonomy/Browser/wwwtax.cgi?mode=Info&id=226103&lvl=3&lin=f&keep=1&srchmode=1&unlock
23	Aconitum brevicalcaratum	(Finet & Gagnep) Diels; var parviflorum W T Wang	2	32		https://www.ncbi.nlm.nih.gov/Taxonomy/Browser/wwwtax.cgi?mode=Tree&id=1905853&lvl=3&lin=f&keep=1&srchmode=1&unlock
24	Aconitum brunneum	H Mazz	1	16		https://www.ncbi.nlm.nih.gov/Taxonomy/Browser/wwwtax.cgi?mode=Info&id=286037&lvl=3&lin=f&keep=1&srchmode=1&unlock
25	Aconitum bucovinense	Zapa	1	32	Endangered	http://www.worldfloraonline.org/taxon/wfo-0000517006	http://www.phytomorphology.org/aconitum-bucovinense/
26	Aconitum bulbilliferum	H Mazz	1			https://www.ncbi.nlm.nih.gov/Taxonomy/Browser/wwwtax.cgi?mode=Info&id=286047&lvl=3&lin=f&keep=1&srchmode=1&unlock
27	Aconitum bulleyanum	Diels	1	16		https://www.ncbi.nlm.nih.gov/Taxonomy/Browser/wwwtax.cgi?mode=Info&id=226111&lvl=3&lin=f&keep=1&srchmode=1&unlock
28	Aconitum burnatii	Gayer	1	32		https://www.ncbi.nlm.nih.gov/Taxonomy/Browser/wwwtax.cgi?mode=Info&id=1532238&lvl=3&lin=f&keep=1&srchmode=1&unlock
29	Aconitum callianthum	Koidz	1	32		http://www.worldfloraonline.org/taxon/wfo-0000517019
30	Aconitum cammarum	L	1	16, 24, 32	Not threatened	https://www.ncbi.nlm.nih.gov/Taxonomy/Browser/wwwtax.cgi?mode=Info&id=1496654&lvl=3&lin=f&keep=1&srchmode=1&unlock	http://www.phytomorphology.org/aconitum-x-cammarum/
31	Aconitum campylorrhynchum	H Mazz	1			https://www.ncbi.nlm.nih.gov/Taxonomy/Browser/wwwtax.cgi?mode=Info&id=226110&lvl=3&lin=f&keep=1&srchmode=1&unlock
32	Aconitum carmichaelii	Debeaux; var truppelianum (Ulbr) W T Wang & P K Hsiao; var. hwangshanicum W.T.Wang & P.G.Xiao; var. pubescens W.T.Wang & P.G.Xiao; var. tripartitum W.T.Wang; var. truppelianum W.T.Wang	2	32, 48, 64		https://www.ncbi.nlm.nih.gov/Taxonomy/Browser/wwwtax.cgi?mode=Tree&id=85363&lvl=3&lin=f&keep=1&srchmode=1&unlock
33	Aconitum chasmanthum	Stapf ex Holmes	1	16	Critically endangered	https://www.ncbi.nlm.nih.gov/Taxonomy/Browser/wwwtax.cgi?mode=Info&id=2486370&lvl=3&lin=f&keep=1&srchmode=1&unlock
34	Aconitum chienningense	var. lasiocarpum W. T. Wang	1			https://www.ncbi.nlm.nih.gov/Taxonomy/Browser/wwwtax.cgi?mode=Info&id=219068&lvl=3&lin=f&keep=1&srchmode=1&unlock
35	Aconitum chiisanense	Nakai	1	16		https://www.ncbi.nlm.nih.gov/Taxonomy/Browser/wwwtax.cgi?mode=Info&id=246709&lvl=3&lin=f&keep=1&srchmode=1&unlock
36	Aconitum chinense	Siebold ex Siebold & Zucc	1	32		http://www.worldfloraonline.org/taxon/wfo-0000517078
37	Aconitum chrysopilum	Nakai	1	16		https://www.ncbi.nlm.nih.gov/Taxonomy/Browser/wwwtax.cgi?mode=Info&id=2152796&lvl=3&lin=f&keep=1&srchmode=1&unlock
38	Aconitum chrysotrichum	W T Wang	1	32		https://www.ncbi.nlm.nih.gov/Taxonomy/Browser/wwwtax.cgi?mode=Info&id=219063&lvl=3&lin=f&keep=1&srchmode=1&unlock
39	Aconitum ciliare	DC	1	8		https://www.ncbi.nlm.nih.gov/Taxonomy/Browser/wwwtax.cgi?mode=Info&id=219063&lvl=3&lin=f&keep=1&srchmode=1&unlock
40	Aconitum columbianum	Nutt; var howellii (A Nelson & J F Macbr) C L Hitchc	2	16, 18		https://www.ncbi.nlm.nih.gov/Taxonomy/Browser/wwwtax.cgi?mode=Info&id=157970&lvl=3&lin=f&keep=1&srchmode=1&unlock
41	Aconitum contortum	Finet & Gagnep	1	16		https://www.ncbi.nlm.nih.gov/Taxonomy/Browser/wwwtax.cgi?mode=Info&id=226102&lvl=3&lin=f&keep=1&srchmode=1&unlock
42	Aconitum coreanum	(HLev) Rapaics	1	24, 32	Least concern	https://www.ncbi.nlm.nih.gov/Taxonomy/Browser/wwwtax.cgi?mode=Info&id=662772&lvl=3&lin=f&keep=1&srchmode=1&unlock
43	Aconitum crassiflorum	H Mazz	1	32		https://www.ncbi.nlm.nih.gov/Taxonomy/Browser/wwwtax.cgi?mode=Info&id=215064&lvl=3&lin=f&keep=1&srchmode=1&unlock
44	Aconitum curvipilum	Riedl	1	32		http://www.worldfloraonline.org/taxon/wfo-0000517136
45	Aconitum cymbulatum	(Schmalh.) Lipsky	1			https://www.ncbi.nlm.nih.gov/Taxonomy/Browser/wwwtax.cgi?mode=Info&id=2730526&lvl=3&lin=f&keep=1&srchmode=1&unlock
46	Aconitum czarnohorense	(Zapal) Mitka	1	-	Vulnerable	http://www.worldfloraonline.org/taxon/wfo-0000517141
47	Aconitum decipiens	Vorosch & Anfalov;	1	16,32		https://www.ncbi.nlm.nih.gov/Taxonomy/Browser/wwwtax.cgi?mode=Info&id=50865&lvl=3&lin=f&keep=1&srchmode=1&unlock
48	Aconitum degenii	Gayer; paniculatum (Arcang) Mucher; valesiacum (Gayer) Mucher	3	16, 32	Least concern	https://www.ncbi.nlm.nih.gov/Taxonomy/Browser/wwwtax.cgi?mode=Tree&id=721841&lvl=3&lin=f&keep=1&srchmode=1&unlock
49	Aconitum delavayi	Franch	1	16, 32, 64		https://www.ncbi.nlm.nih.gov/Taxonomy/Browser/wwwtax.cgi?mode=Info&id=226099&lvl=3&lin=f&keep=1&srchmode=1&unlock
50	Aconitum delphinifolium	DC	1	16, 32		https://www.ncbi.nlm.nih.gov/Taxonomy/Browser/wwwtax.cgi?mode=Info&id=157971&lvl=3&lin=f&keep=1&srchmode=1&unlock
51	Aconitum desoulavyi	Kom	1			https://www.ncbi.nlm.nih.gov/Taxonomy/Browser/wwwtax.cgi?mode=Info&id=1960951&lvl=3&lin=f&keep=1&srchmode=1&unlock
52	Aconitum duclouxii	H Lev	1	16		http://www.worldfloraonline.org/taxon/wfo-0000517207
53	Aconitum elliotii	Lauener; var. doshongense	2			https://www.ncbi.nlm.nih.gov/Taxonomy/Browser/wwwtax.cgi?mode=Tree&id=632152&lvl=3&lin=f&keep=1&srchmode=1&unlock
54	Aconitum episcopale	H Lev; var. villosulipes	2	16,32		https://www.ncbi.nlm.nih.gov/Taxonomy/Browser/wwwtax.cgi?mode=Tree&id=226106&lvl=3&lin=f&keep=1&srchmode=1&unlock
55	Aconitum exaltatum	Bernh. ex Rchb	1			https://www.ncbi.nlm.nih.gov/Taxonomy/Browser/wwwtax.cgi?mode=Info&id=2739769&lvl=3&lin=f&keep=1&srchmode=1&unlock
56	Aconitum falciforme	H Mazz	1	16		https://www.ncbi.nlm.nih.gov/Taxonomy/Browser/wwwtax.cgi?mode=Info&id=1960952&lvl=3&lin=f&keep=1&srchmode=1&unlock
57	Aconitum fauriei	H Lev & Vaniot	1	32		http://www.worldfloraonline.org/taxon/wfo-0000517239
58	Aconitum ferox	Wall ex Ser	1	20, 34	Vulnerable	https://www.ncbi.nlm.nih.gov/Taxonomy/Browser/wwwtax.cgi?mode=Info&id=50866&lvl=3&lin=f&keep=1&srchmode=1&unlock
59	Aconitum finetianum	H Mazz	1	16		https://www.ncbi.nlm.nih.gov/Taxonomy/Browser/wwwtax.cgi?mode=Info&id=219064&lvl=3&lin=f&keep=1&srchmode=1&unlock
60	Aconitum firmum	Rchb; fissurae Nyar; maninense Starm; moravicum V Skalicky; subsp. firmum	5	24, 32, 48, 64	Vulnerable	https://www.ncbi.nlm.nih.gov/Taxonomy/Browser/wwwtax.cgi?mode=Info&id=219064&lvl=3&lin=f&keep=1&srchmode=1&unlock	http://www.phytomorphology.org/aconitum-firmum/
61	Aconitum fischeri	Rchb; var arcuatum (Maxim) Regel	2	16, 32		http://www.worldfloraonline.org/taxon/wfo-0000517258
62	Aconitum flavum	H Mazz	1	2022-08-16		https://www.ncbi.nlm.nih.gov/Taxonomy/Browser/wwwtax.cgi?mode=Info&id=286045&lvl=3&lin=f&keep=1&srchmode=1&unlock
63	Aconitum fletcherianum	G Taylor	1	12		https://www.ncbi.nlm.nih.gov/Taxonomy/Browser/wwwtax.cgi?mode=Info&id=1905855&lvl=3&lin=f&keep=1&srchmode=1&unlock
64	Aconitum formosanum	Tamura	1	32		http://www.worldfloraonline.org/taxon/wfo-0000517271
65	Aconitum forrestii	Stapf; var. albovillosum	2	16		https://www.ncbi.nlm.nih.gov/Taxonomy/Browser/wwwtax.cgi?mode=Tree&id=219065&lvl=3&lin=f&keep=1&srchmode=1&unlock
66	Aconitum franchetii	Finet & Gagnepain; var. villosulum; var. glabrescens; var. subnaviculare; var. franchetii; var. lasiocalyx; var. geniculatum	7	-		https://www.ncbi.nlm.nih.gov/Taxonomy/Browser/wwwtax.cgi?mode=Info&id=215069&lvl=3&lin=f&keep=1&srchmode=1&unlock
67	Aconitum fukutomei	Hayata	1	32		https://www.ncbi.nlm.nih.gov/Taxonomy/Browser/wwwtax.cgi?mode=Info&id=2803370&lvl=3&lin=f&keep=1&srchmode=1&unlock
68	Aconitum gassanense	Kadota & S Kato	1	16		https://www.ncbi.nlm.nih.gov/Taxonomy/Browser/wwwtax.cgi?mode=Info&id=1632807&lvl=3&lin=f&keep=1&srchmode=1&unlock
69	Aconitum gayeri	Starmuhl	1	16	Least concern	http://www.worldfloraonline.org/taxon/wfo-0000517297	http://www.phytomorphology.org/aconitum-x-gayeri/
70	Aconitum geniculatum	H R Fletcher & Lauener; var. humilius; var. unguiculatum; W T Wang	4	16		https://www.ncbi.nlm.nih.gov/Taxonomy/Browser/wwwtax.cgi?mode=Tree&id=632155&lvl=3&lin=f&keep=1&srchmode=1&unlock
71	Aconitum georgei	Comber	1	16		https://www.ncbi.nlm.nih.gov/Taxonomy/Browser/wwwtax.cgi?mode=Info&id=226105&lvl=3&lin=f&keep=1&srchmode=1&unlock
72	Aconitum gigas	H Lev & Vaniot	1	16		https://www.ncbi.nlm.nih.gov/Taxonomy/Browser/wwwtax.cgi?mode=Info&id=50867&lvl=3&lin=f&keep=1&srchmode=1&unlock
73	Aconitum grossedentatum	Nakai ex Morio	1	32, 48		https://www.ncbi.nlm.nih.gov/Taxonomy/Browser/wwwtax.cgi?mode=Info&id=1850455&lvl=3&lin=f&keep=1&srchmode=1&unlock
74	Aconitum gymnandrum	Maxim	1	16		http://www.worldfloraonline.org/taxon/wfo-0000517334
75	Aconitum habaense	W T Wang	1			https://www.ncbi.nlm.nih.gov/Taxonomy/Browser/wwwtax.cgi?mode=Info&id=2894518&lvl=3&lin=f&keep=1&srchmode=1&unlock
76	Aconitum hakusanense	Nakai	1	32		https://www.ncbi.nlm.nih.gov/Taxonomy/Browser/wwwtax.cgi?mode=Info&id=246710&lvl=3&lin=f&keep=1&srchmode=1&unlock
77	Aconitum hamatipetalum	W T Wang	1			https://www.ncbi.nlm.nih.gov/Taxonomy/Browser/wwwtax.cgi?mode=Info&id=286043&lvl=3&lin=f&keep=1&srchmode=1&unlock
78	Aconitum hebegynum	DC	1			https://www.ncbi.nlm.nih.gov/Taxonomy/Browser/wwwtax.cgi?mode=Info&id=1496666&lvl=3&lin=f&keep=1&srchmode=1&unlock
79	Aconitum hemsleyanum	E Pritz; var. circinatum	1	16		https://www.ncbi.nlm.nih.gov/Taxonomy/Browser/wwwtax.cgi?mode=Tree&id=215070&lvl=3&lin=f&keep=1&srchmode=1&unlock
80	Aconitum henryi	E Pritz ex Diels	1	16		https://www.ncbi.nlm.nih.gov/Taxonomy/Browser/wwwtax.cgi?mode=Info&id=1445621&lvl=3&lin=f&keep=1&srchmode=1&unlock
81	Aconitum heterophyllum	Stapf; var bracteatum Stapf; Wall ex Royle	3	16, 26, 32, 40	Endangered	https://www.ncbi.nlm.nih.gov/Taxonomy/Browser/wwwtax.cgi?mode=Info&id=279769&lvl=3&lin=f&keep=1&srchmode=1&unlock
82	Aconitum hicksii	Lauener	1			https://www.ncbi.nlm.nih.gov/Taxonomy/Browser/wwwtax.cgi?mode=Info&id=632158&lvl=3&lin=f&keep=1&srchmode=1&unlock
83	Aconitum hisautii	Nakai	1	32		http://www.worldfloraonline.org/taxon/wfo-0000517381
84	Aconitum hookeri	Stapf	1			https://www.ncbi.nlm.nih.gov/Taxonomy/Browser/wwwtax.cgi?mode=Info&id=50868&lvl=3&lin=f&keep=1&srchmode=1&unlock
85	Aconitum hopeiense	(W T Wang) Vorosch	1	16		https://www.ncbi.nlm.nih.gov/Taxonomy/Browser/wwwtax.cgi?mode=Info&id=1960955&lvl=3&lin=f&keep=1&srchmode=1&unlock
86	Aconitum huiliense	H Mazz	1			https://www.ncbi.nlm.nih.gov/Taxonomy/Browser/wwwtax.cgi?mode=Info&id=286049&lvl=3&lin=f&keep=1&srchmode=1&unlock
87	Aconitum iidemontanum	Kadota & Kita & Ueda	1	16		https://www.ncbi.nlm.nih.gov/Taxonomy/Browser/wwwtax.cgi?mode=Info&id=50869&lvl=3&lin=f&keep=1&srchmode=1&unlock
88	Aconitum iinumae	Kadota	1			https://www.ncbi.nlm.nih.gov/Taxonomy/Browser/wwwtax.cgi?mode=Info&id=1825863&lvl=3&lin=f&keep=1&srchmode=1&unlock
89	Aconitum incisifidum	W T Wang	1			https://www.ncbi.nlm.nih.gov/Taxonomy/Browser/wwwtax.cgi?mode=Info&id=632159&lvl=3&lin=f&keep=1&srchmode=1&unlock
90	Aconitum iochanicum	Ulbrich	1			https://www.ncbi.nlm.nih.gov/Taxonomy/Browser/wwwtax.cgi?mode=Info&id=2034151&lvl=3&lin=f&keep=1&srchmode=1&unlock
91	Aconitum iranshahrii	Riedl	1			https://www.ncbi.nlm.nih.gov/Taxonomy/Browser/wwwtax.cgi?mode=Info&id=1969811&lvl=3&lin=f&keep=1&srchmode=1&unlock
92	Aconitum jaluense	Kom; iwatekense (Nakai) Kadota; var triphyllum (Nakai); jaluense	4	16, 32		https://www.ncbi.nlm.nih.gov/Taxonomy/Browser/wwwtax.cgi?mode=Tree&id=85362&lvl=3&lin=f&keep=1&srchmode=1&unlock
93	Aconitum japonicum	ibukiense (Nakai) Kadota; napiforme (H Lev & Vaniot) Kadota; subcuneatum (Nakai) Kadota; Thunb; maritimum	5	16, 32, 38, 64		https://www.ncbi.nlm.nih.gov/Taxonomy/Browser/wwwtax.cgi?mode=Tree&id=1478108&lvl=3&lin=f&keep=1&srchmode=1&unlock
94	Aconitum jeholense	var angustius (W T Wang) Y Z Zhao	1	32		http://www.worldfloraonline.org/taxon/wfo-0000517441
95	Aconitum jinyangense	W T Wang	1			https://www.ncbi.nlm.nih.gov/Taxonomy/Browser/wwwtax.cgi?mode=Info&id=1478109&lvl=3&lin=f&keep=1&srchmode=1&unlock
96	Aconitum karafutense	Miyabe & Nakai	1	16		http://www.worldfloraonline.org/taxon/wfo-0000517456
97	Aconitum karakolicum	Rapaics	1			https://www.ncbi.nlm.nih.gov/Taxonomy/Browser/wwwtax.cgi?mode=Info&id=286046&lvl=3&lin=f&keep=1&srchmode=1&unlock
98	Aconitum kirinense	Nakai	1	16		https://www.ncbi.nlm.nih.gov/Taxonomy/Browser/wwwtax.cgi?mode=Info&id=1961225&lvl=3&lin=f&keep=1&srchmode=1&unlock
99	Aconitum kitadakense	Nakai	1	32		https://www.ncbi.nlm.nih.gov/Taxonomy/Browser/wwwtax.cgi?mode=Info&id=50870&lvl=3&lin=f&keep=1&srchmode=1&unlock
100	Aconitum kiyomiense	Kadota	1	32		https://www.ncbi.nlm.nih.gov/Taxonomy/Browser/wwwtax.cgi?mode=Info&id=50871&lvl=3&lin=f&keep=1&srchmode=1&unlock
101	Aconitum kongboense	Lauener; var. villosum	2			https://www.ncbi.nlm.nih.gov/Taxonomy/Browser/wwwtax.cgi?mode=Tree&id=632161&lvl=3&lin=f&keep=1&srchmode=1&unlock
102	Aconitum krasnoboroffii	Kadota	1	32		https://www.ncbi.nlm.nih.gov/Taxonomy/Browser/wwwtax.cgi?mode=Info&id=50872&lvl=3&lin=f&keep=1&srchmode=1&unlock
103	Aconitum krylovii	Steinb	1	16		https://www.ncbi.nlm.nih.gov/Taxonomy/Browser/wwwtax.cgi?mode=Info&id=1960953&lvl=3&lin=f&keep=1&srchmode=1&unlock
104	Aconitum kusnezoffii	Rchb	1	16, 24, 32		https://www.ncbi.nlm.nih.gov/Taxonomy/Browser/wwwtax.cgi?mode=Tree&id=239685&lvl=3&lin=f&keep=1&srchmode=1&unlock
105	Aconitum laeve	Royle	1	16		https://www.ncbi.nlm.nih.gov/Taxonomy/Browser/wwwtax.cgi?mode=Info&id=1960954&lvl=3&lin=f&keep=1&srchmode=1&unlock
106	Aconitum lamarckii	Rchb	1	16, 32		http://www.worldfloraonline.org/taxon/wfo-0000517515
107	Aconitum lasiocarpum	(Rchb) Gayer; kotulae (Pawa) Starm & Mitka	2	16	Vulnerable, Near threatened	https://www.ncbi.nlm.nih.gov/Taxonomy/Browser/wwwtax.cgi?mode=Info&id=1496656&lvl=3&lin=f&keep=1&srchmode=1&unlock	http://www.phytomorphology.org/aconitum-lasiocarpum/
108	Aconitum lasiostomum	Rchb ex Besser	1			https://www.ncbi.nlm.nih.gov/Taxonomy/Browser/wwwtax.cgi?mode=Info&id=147270&lvl=3&lin=f&keep=1&srchmode=1&unlock
109	Aconitum legendrei	H Mazz	1	16		https://www.ncbi.nlm.nih.gov/Taxonomy/Browser/wwwtax.cgi?mode=Info&id=286042&lvl=3&lin=f&keep=1&srchmode=1&unlock
110	Aconitum lethale	Griff	1	32		http://www.worldfloraonline.org/taxon/wfo-0000517540
111	Aconitum leucostomum	Vorosch; var. hopeiense	1	16		https://www.ncbi.nlm.nih.gov/Taxonomy/Browser/wwwtax.cgi?mode=Tree&id=632164&lvl=3&lin=f&keep=1&srchmode=1&unlock
112	Aconitum liangshanicum	W T Wang	1			https://www.ncbi.nlm.nih.gov/Taxonomy/Browser/wwwtax.cgi?mode=Info&id=286051&lvl=3&lin=f&keep=1&srchmode=1&unlock
113	Aconitum liljestrandii	H Mazz	1	16		https://www.ncbi.nlm.nih.gov/Taxonomy/Browser/wwwtax.cgi?mode=Info&id=219067&lvl=3&lin=f&keep=1&srchmode=1&unlock
114	Aconitum loczyanum	Rapaics	1	16		https://www.ncbi.nlm.nih.gov/Taxonomy/Browser/wwwtax.cgi?mode=Info&id=1850456&lvl=3&lin=f&keep=1&srchmode=1&unlock
115	Aconitum longecassidatum	Nakai	1	16		https://www.ncbi.nlm.nih.gov/Taxonomy/Browser/wwwtax.cgi?mode=Info&id=1045224&lvl=3&lin=f&keep=1&srchmode=1&unlock
116	Aconitum longtouense	T.L.Ming	1			https://www.ncbi.nlm.nih.gov/Taxonomy/Browser/wwwtax.cgi?mode=Info&id=50873&lvl=3&lin=f&keep=1&srchmode=1&unlock
117	Aconitum lucidusculum	Nakai	1	32		https://www.ncbi.nlm.nih.gov/Taxonomy/Browser/wwwtax.cgi?mode=Info&id=1478110&lvl=3&lin=f&keep=1&srchmode=1&unlock
118	Aconitum ludlowii	Exell	1	16		https://www.ncbi.nlm.nih.gov/Taxonomy/Browser/wwwtax.cgi?mode=Info&id=1550516&lvl=3&lin=f&keep=1&srchmode=1&unlock
119	Aconitum lycoctonum	L; vulparia	1	16, 24, 32		https://www.ncbi.nlm.nih.gov/Taxonomy/Browser/wwwtax.cgi?mode=Tree&id=112589&lvl=3&lin=f&keep=1&srchmode=1&unlock
120	Aconitum macrorhynchum	Turcz ex Ledeb	1	16		http://www.worldfloraonline.org/taxon/wfo-0000517616
121	Aconitum maximum	Pall ex DC; kurilense (Takeda) Kadota	2	16, 32		http://www.worldfloraonline.org/taxon/wfo-0000517629
122	Aconitum metajaponicum	Nakai	1	16		http://www.worldfloraonline.org/taxon/wfo-0000517638
123	Aconitum misaoanum	-	0			https://www.ncbi.nlm.nih.gov/Taxonomy/Browser/wwwtax.cgi?mode=Info&id=1478111&lvl=3&lin=f&keep=1&srchmode=1&unlock
124	Aconitum moldavicum	Hacq	1	16, 32	Least concern	https://www.ncbi.nlm.nih.gov/Taxonomy/Browser/wwwtax.cgi?mode=Info&id=112590&lvl=3&lin=f&keep=1&srchmode=1&unlock	http://www.phytomorphology.org/aconitum-moldavicum/,
125	Aconitum monanthum	Nakai	1			https://www.ncbi.nlm.nih.gov/Taxonomy/Browser/wwwtax.cgi?mode=Info&id=226115&lvl=3&lin=f&keep=1&srchmode=1&unlock
126	Aconitum montibaicalense	Vorosch	1	32		http://www.worldfloraonline.org/taxon/wfo-0000517663
127	Aconitum monticola	Steinb	1	16		https://www.ncbi.nlm.nih.gov/Taxonomy/Browser/wwwtax.cgi?mode=Info&id=1045225&lvl=3&lin=f&keep=1&srchmode=1&unlock
128	Aconitum moschatum	Stapf	1			https://www.ncbi.nlm.nih.gov/Taxonomy/Browser/wwwtax.cgi?mode=Info&id=1960956&lvl=3&lin=f&keep=1&srchmode=1&unlock
129	Aconitum nagarum	Stapf; var lasiandrum W T Wang; var. heterotrichum; var. f dielsianum	2	16		https://www.ncbi.nlm.nih.gov/Taxonomy/Browser/wwwtax.cgi?mode=Info&id=1960956&lvl=3&lin=f&keep=1&srchmode=1&unlock
130	Aconitum nanum	(Baumg) Simonk	1	32	Vulnerable	http://www.worldfloraonline.org/taxon/wfo-0000517684	http://www.phytomorphology.org/aconitum-x-nanum/
131	Aconitum napellus	L; corsicum (Gayer) W Seitz; lobelii Mucher; lusitanicum Rouy; vulgare (DC) Rouy & Foucaud	5	16, 24, 32	Least concern, Vulnerable	https://www.ncbi.nlm.nih.gov/Taxonomy/Browser/wwwtax.cgi?mode=Info&id=112591&lvl=3&lin=f&keep=1&srchmode=1&unlock
132	Aconitum nasutum	Fisch ex Rchb; var. pubiceps	1	16, 28, 32		https://www.ncbi.nlm.nih.gov/Taxonomy/Browser/wwwtax.cgi?mode=Tree&id=1496658&lvl=3&lin=f&keep=1&srchmode=1&unlock
133	Aconitum naviculare	Stapf	1	32		https://www.ncbi.nlm.nih.gov/Taxonomy/Browser/wwwtax.cgi?mode=Info&id=1551426&lvl=3&lin=f&keep=1&srchmode=1&unlock
134	Aconitum nemorum	Popov	1			https://www.ncbi.nlm.nih.gov/Taxonomy/Browser/wwwtax.cgi?mode=Info&id=286048&lvl=3&lin=f&keep=1&srchmode=1&unlock
135	Aconitum nevadense	Gayer	1			https://www.ncbi.nlm.nih.gov/Taxonomy/Browser/wwwtax.cgi?mode=Info&id=2739826&lvl=3&lin=f&keep=1&srchmode=1&unlock
136	Aconitum nipponicum	Nakai; micranthum (Nakai) Kadota; var septemcarpum (Nakai) Kadota; nipponicum; septemcarpum	3	32		https://www.ncbi.nlm.nih.gov/Taxonomy/Browser/wwwtax.cgi?mode=Tree&id=50875&lvl=3&lin=f&keep=1&srchmode=1&unlock
137	Aconitum noveboracense	A Gray ex Coville	1	16		http://www.worldfloraonline.org/taxon/wfo-0000517786
138	Aconitum novoluridum	Munz	1	16		https://www.ncbi.nlm.nih.gov/Taxonomy/Browser/wwwtax.cgi?mode=Info&id=1905856&lvl=3&lin=f&keep=1&srchmode=1&unlock
139	Aconitum okuyamae	Nakai	1	32		https://www.ncbi.nlm.nih.gov/Taxonomy/Browser/wwwtax.cgi?mode=Info&id=50876&lvl=3&lin=f&keep=1&srchmode=1&unlock
140	Aconitum orientale	Mill	1	2022-07-16		https://www.ncbi.nlm.nih.gov/Taxonomy/Browser/wwwtax.cgi?mode=Info&id=112592&lvl=3&lin=f&keep=1&srchmode=1&unlock
141	Aconitum ouvrardianum	H Mazz	1	16		https://www.ncbi.nlm.nih.gov/Taxonomy/Browser/wwwtax.cgi?mode=Info&id=1960957&lvl=3&lin=f&keep=1&srchmode=1&unlock
142	Aconitum palmatum	D Don	1	30, 32, 45, 46, 47, 48, 52		https://www.ncbi.nlm.nih.gov/Taxonomy/Browser/wwwtax.cgi?mode=Info&id=279772&lvl=3&lin=f&keep=1&srchmode=1&unlock
143	Aconitum paniculigerum	var wulingense (Nakai) W T Wang	1	16, 32		http://www.worldfloraonline.org/taxon/wfo-0000517860
144	Aconitum paradoxum	Rchb	1	16		http://www.worldfloraonline.org/taxon/wfo-0000517864
145	Aconitum paskoi	Vorosch	1	16, 32		https://www.ncbi.nlm.nih.gov/Taxonomy/Browser/wwwtax.cgi?mode=Info&id=50877&lvl=3&lin=f&keep=1&srchmode=1&unlock
146	Aconitum pauciflorum	Bertol	1			https://www.ncbi.nlm.nih.gov/Taxonomy/Browser/wwwtax.cgi?mode=Info&id=1960958&lvl=3&lin=f&keep=1&srchmode=1&unlock
147	Aconitum pawlowskii	Mitka & Starm	1	16	Not evaluated	http://www.worldfloraonline.org/taxon/wfo-0000517878	https://www.gbif.org/occurrence/search?dataset_key=d8cd16ba-bb74-4420-821e-083f2bac17c2&taxon_key=3922045
148	Aconitum pendulicarpum	P K Chang ex W T Wang	1	16		http://www.worldfloraonline.org/taxon/wfo-0000517881
149	Aconitum pendulum	N Busch	1	16		https://www.ncbi.nlm.nih.gov/Taxonomy/Browser/wwwtax.cgi?mode=Info&id=50878&lvl=3&lin=f&keep=1&srchmode=1&unlock
150	Aconitum pentheri	Hayek	1	32		https://www.ncbi.nlm.nih.gov/Taxonomy/Browser/wwwtax.cgi?mode=Info&id=50878&lvl=3&lin=f&keep=1&srchmode=1&unlock
151	Aconitum phyllostegium	H Mazz	1			https://www.ncbi.nlm.nih.gov/Taxonomy/Browser/wwwtax.cgi?mode=Info&id=2486371&lvl=3&lin=f&keep=1&srchmode=1&unlock
152	Aconitum piepunense	H Mazz	1	16,32		https://www.ncbi.nlm.nih.gov/Taxonomy/Browser/wwwtax.cgi?mode=Info&id=226113&lvl=3&lin=f&keep=1&srchmode=1&unlock
153	Aconitum pilipes	Gaiyer	1	16		https://www.ncbi.nlm.nih.gov/Taxonomy/Browser/wwwtax.cgi?mode=Info&id=2908666&lvl=3&lin=f&keep=1&srchmode=1&unlock
154	Aconitum pilopetalum	W T Wang & L. Q. Li	1			https://www.ncbi.nlm.nih.gov/Taxonomy/Browser/wwwtax.cgi?mode=Info&id=286036&lvl=3&lin=f&keep=1&srchmode=1&unlock
155	Aconitum plicatum	Kohler ex Rchb; plicatum	2	16, 24 ,32		https://www.ncbi.nlm.nih.gov/Taxonomy/Browser/wwwtax.cgi?mode=Tree&id=1496660&lvl=3&lin=f&keep=1&srchmode=1&unlock
156	Aconitum polycarpum	Chang ex W. T. Wang	1			https://www.ncbi.nlm.nih.gov/Taxonomy/Browser/wwwtax.cgi?mode=Info&id=286044&lvl=3&lin=f&keep=1&srchmode=1&unlock
157	Aconitum polyschistum	H Mazz	1			https://www.ncbi.nlm.nih.gov/Taxonomy/Browser/wwwtax.cgi?mode=Info&id=2486372&lvl=3&lin=f&keep=1&srchmode=1&unlock
158	Aconitum popovii	Steinb & Schischk ex Siplivinskii	1	16		http://www.worldfloraonline.org/taxon/wfo-0000517909
159	Aconitum productum	Rchb	1	32		http://www.worldfloraonline.org/taxon/wfo-0000517914
160	Aconitum pseudolaeve	Nakai	1	16		https://www.ncbi.nlm.nih.gov/Taxonomy/Browser/wwwtax.cgi?mode=Info&id=1351828&lvl=3&lin=f&keep=1&srchmode=1&unlock
161	Aconitum pseudostapfianum	W T Wang	1	2022-06-16		http://www.worldfloraonline.org/taxon/wfo-0000517930
162	Aconitum pterocaule	Koidz; var siroumense (Nakai) Kadota	2	16		https://www.ncbi.nlm.nih.gov/Taxonomy/Browser/wwwtax.cgi?mode=Info&id=1632808&lvl=3&lin=f&keep=1&srchmode=1&unlock
163	Aconitum puchonroenicum	Uyeki & Sakata	1			https://www.ncbi.nlm.nih.gov/Taxonomy/Browser/wwwtax.cgi?mode=Info&id=2863115&lvl=3&lin=f&keep=1&srchmode=1&unlock
164	Aconitum pulchellum	H Mazz	1	16		https://www.ncbi.nlm.nih.gov/Taxonomy/Browser/wwwtax.cgi?mode=Info&id=219069&lvl=3&lin=f&keep=1&srchmode=1&unlock
165	Aconitum quelpaertense	Nakai	1			https://www.ncbi.nlm.nih.gov/Taxonomy/Browser/wwwtax.cgi?mode=Info&id=1905857&lvl=3&lin=f&keep=1&srchmode=1&unlock
166	Aconitum racemulosum	Franch	1	16		https://www.ncbi.nlm.nih.gov/Taxonomy/Browser/wwwtax.cgi?mode=Info&id=215067&lvl=3&lin=f&keep=1&srchmode=1&unlock
167	Aconitum raddeanum	Regel	1	16, 32		http://www.worldfloraonline.org/taxon/wfo-0000517965
168	Aconitum ranunculoides	Turcz.	1			https://www.ncbi.nlm.nih.gov/Taxonomy/Browser/wwwtax.cgi?mode=Info&id=1960960&lvl=3&lin=f&keep=1&srchmode=1&unlock
169	Aconitum reclinatum	A Gray	1	16		https://www.ncbi.nlm.nih.gov/Taxonomy/Browser/wwwtax.cgi?mode=Info&id=1905858&lvl=3&lin=f&keep=1&srchmode=1&unlock
170	Aconitum refractum	(Finet & Gagnepain); H Mazz	2			https://www.ncbi.nlm.nih.gov/Taxonomy/Browser/wwwtax.cgi?mode=Info&id=286040&lvl=3&lin=f&keep=1&srchmode=1&unlock
171	Aconitum richardsonianum	Lauener; var. pseudosessiliflorum	2			https://www.ncbi.nlm.nih.gov/Taxonomy/Browser/wwwtax.cgi?mode=Info&id=1905859&lvl=3&lin=f&keep=1&srchmode=1&unlock
172	Aconitum rilongense	Kadota	1	32		https://www.ncbi.nlm.nih.gov/Taxonomy/Browser/wwwtax.cgi?mode=Info&id=1905859&lvl=3&lin=f&keep=1&srchmode=1&unlock
173	Aconitum rockii	H R Fletcher & Lauener; var fengii W T Wang	2	8,16,32		https://www.ncbi.nlm.nih.gov/Taxonomy/Browser/wwwtax.cgi?mode=Info&id=50879&lvl=3&lin=f&keep=1&srchmode=1&unlock
174	Aconitum rubicundum	Fisch ex Steud	1	16		http://www.worldfloraonline.org/taxon/wfo-0000518008
175	Aconitum sachalinense	F Schmidt; yezoense (Nakai) Kadota; sachalinense; yezoense	4	16, 32		https://www.ncbi.nlm.nih.gov/Taxonomy/Browser/wwwtax.cgi?mode=Tree&id=50880&lvl=3&lin=f&keep=1&srchmode=1&unlock
176	Aconitum sajanense	Kuminova; var. hupehanum; var. vaginatum	3	16		https://www.ncbi.nlm.nih.gov/Taxonomy/Browser/wwwtax.cgi?mode=Info&id=1960961&lvl=3&lin=f&keep=1&srchmode=1&unlock
177	Aconitum sanyoense	Nakai	1	16		https://www.ncbi.nlm.nih.gov/Taxonomy/Browser/wwwtax.cgi?mode=Info&id=49189&lvl=3&lin=f&keep=1&srchmode=1&unlock
178	Aconitum scaposum	Franch	1	16		https://www.ncbi.nlm.nih.gov/Taxonomy/Browser/wwwtax.cgi?mode=Tree&id=215065&lvl=3&lin=f&keep=1&srchmode=1&unlock
179	Aconitum sczukinii	Turcz	1	64		https://www.ncbi.nlm.nih.gov/Taxonomy/Browser/wwwtax.cgi?mode=Info&id=1961227&lvl=3&lin=f&keep=1&srchmode=1&unlock
180	Aconitum senanense	Nakai; paludicola (Nakai) Kadota; senanense	3	16, 32, 48		https://www.ncbi.nlm.nih.gov/Taxonomy/Browser/wwwtax.cgi?mode=Tree&id=50881&lvl=3&lin=f&keep=1&srchmode=1&unlock
181	Aconitum septentrionale	Koelle	1	16		https://www.ncbi.nlm.nih.gov/Taxonomy/Browser/wwwtax.cgi?mode=Info&id=112593&lvl=3&lin=f&keep=1&srchmode=1&unlock
182	Aconitum seravschanicum	Steinb	1			https://www.ncbi.nlm.nih.gov/Taxonomy/Browser/wwwtax.cgi?mode=Info&id=246713&lvl=3&lin=f&keep=1&srchmode=1&unlock
183	Aconitum sessiliflorum	(Finet & Gagnepain); H Mazz	2			https://www.ncbi.nlm.nih.gov/Taxonomy/Browser/wwwtax.cgi?mode=Info&id=219070&lvl=3&lin=f&keep=1&srchmode=1&unlock
184	Aconitum shennongjiaense	Q Gao & Q E Yang	1	16		https://www.ncbi.nlm.nih.gov/Taxonomy/Browser/wwwtax.cgi?mode=Info&id=1052167&lvl=3&lin=f&keep=1&srchmode=1&unlock
185	Aconitum sichotense	Kom	1	16, 32		http://www.worldfloraonline.org/taxon/wfo-0000518073
186	Aconitum sinomontanum	Nakai; var angustius W T Wang	2	16, 32		https://www.ncbi.nlm.nih.gov/Taxonomy/Browser/wwwtax.cgi?mode=Info&id=215066&lvl=3&lin=f&keep=1&srchmode=1&unlock
187	Aconitum sinomontanum	Nakai	1			https://www.ncbi.nlm.nih.gov/Taxonomy/Browser/wwwtax.cgi?mode=Info&id=215066&lvl=3&lin=f&keep=1&srchmode=1&unlock
188	Aconitum smithii	Ulbr. ex H Mazz	1			https://www.ncbi.nlm.nih.gov/Taxonomy/Browser/wwwtax.cgi?mode=Info&id=1336179&lvl=3&lin=f&keep=1&srchmode=1&unlock
189	Aconitum soongaricum	var. angustius	1			https://www.ncbi.nlm.nih.gov/Taxonomy/Browser/wwwtax.cgi?mode=Tree&id=568276&lvl=3&lin=f&keep=1&srchmode=1&unlock
190	Aconitum souliei	Finet & Gagnep	1	16		http://www.worldfloraonline.org/taxon/wfo-0000518098
191	Aconitum soyaense	Kadota	1			https://www.ncbi.nlm.nih.gov/Taxonomy/Browser/wwwtax.cgi?mode=Info&id=1850457&lvl=3&lin=f&keep=1&srchmode=1&unlock
192	Aconitum spathulatum	W T Wang	1	16		https://www.ncbi.nlm.nih.gov/Taxonomy/Browser/wwwtax.cgi?mode=Info&id=2034153&lvl=3&lin=f&keep=1&srchmode=1&unlock
193	Aconitum spiripetalum	H Mazz	1			https://www.ncbi.nlm.nih.gov/Taxonomy/Browser/wwwtax.cgi?mode=Info&id=286038&lvl=3&lin=f&keep=1&srchmode=1&unlock
194	Aconitum stapfianum	H Mazz	1			https://www.ncbi.nlm.nih.gov/Taxonomy/Browser/wwwtax.cgi?mode=Info&id=226100&lvl=3&lin=f&keep=1&srchmode=1&unlock
195	Aconitum stapfianum	H Mazz	1	16		https://www.ncbi.nlm.nih.gov/Taxonomy/Browser/wwwtax.cgi?mode=Info&id=226100&lvl=3&lin=f&keep=1&srchmode=1&unlock
196	Aconitum stramineiflorum	P K Chang ex W T Wang	1	16		http://www.worldfloraonline.org/taxon/wfo-0000518116
197	Aconitum subvillosum	Vorosch	1	32		http://www.worldfloraonline.org/taxon/wfo-0000518133
198	Aconitum sukaczevii	Steinb	1	16		https://www.ncbi.nlm.nih.gov/Taxonomy/Browser/wwwtax.cgi?mode=Info&id=1960962&lvl=3&lin=f&keep=1&srchmode=1&unlock
199	Aconitum sungpanense	var. leucanthum	1			https://www.ncbi.nlm.nih.gov/Taxonomy/Browser/wwwtax.cgi?mode=Tree&id=226107&lvl=3&lin=f&keep=1&srchmode=1&unlock
200	Aconitum superbum	Fritsch	1	24, 32		https://www.ncbi.nlm.nih.gov/Taxonomy/Browser/wwwtax.cgi?mode=Info&id=1496661&lvl=3&lin=f&keep=1&srchmode=1&unlock
201	Aconitum tanguticum	(Maxim) Stapf; var. trichocarpum	1	16		https://www.ncbi.nlm.nih.gov/Taxonomy/Browser/wwwtax.cgi?mode=Tree&id=215068&lvl=3&lin=f&keep=1&srchmode=1&unlock
202	Aconitum taronense	(H Mazz) H.R.Fletcher & Lauener	1			https://www.ncbi.nlm.nih.gov/Taxonomy/Browser/wwwtax.cgi?mode=Info&id=50883&lvl=3&lin=f&keep=1&srchmode=1&unlock
203	Aconitum tatsienense	Finet & Gagnep.	1			https://www.ncbi.nlm.nih.gov/Taxonomy/Browser/wwwtax.cgi?mode=Info&id=286039&lvl=3&lin=f&keep=1&srchmode=1&unlock
204	Aconitum tauricum	Wulfen	1	24, 32		https://www.ncbi.nlm.nih.gov/Taxonomy/Browser/wwwtax.cgi?mode=Info&id=1532244&lvl=3&lin=f&keep=1&srchmode=1&unlock
205	Aconitum thyraicum	Blocki	1	16		http://www.worldfloraonline.org/taxon/wfo-0000518189
206	Aconitum tonense	Nakai	1	16		https://www.ncbi.nlm.nih.gov/Taxonomy/Browser/wwwtax.cgi?mode=Info&id=1977831&lvl=3&lin=f&keep=1&srchmode=1&unlock
207	Aconitum tongolense	Ulbr	1	16		https://www.ncbi.nlm.nih.gov/Taxonomy/Browser/wwwtax.cgi?mode=Info&id=286041&lvl=3&lin=f&keep=1&srchmode=1&unlock
208	Aconitum toxicum	Rchb	1	16		https://www.ncbi.nlm.nih.gov/Taxonomy/Browser/wwwtax.cgi?mode=Info&id=1496663&lvl=3&lin=f&keep=1&srchmode=1&unlock
209	Aconitum transsectum	Diels	1	16		https://www.ncbi.nlm.nih.gov/Taxonomy/Browser/wwwtax.cgi?mode=Info&id=226104&lvl=3&lin=f&keep=1&srchmode=1&unlock
210	Aconitum tsaii	W T Wang	1	16		https://www.ncbi.nlm.nih.gov/Taxonomy/Browser/wwwtax.cgi?mode=Info&id=226098&lvl=3&lin=f&keep=1&srchmode=1&unlock
211	Aconitum tuguancunense	Q.E.Yang	1			https://www.ncbi.nlm.nih.gov/Taxonomy/Browser/wwwtax.cgi?mode=Info&id=226097&lvl=3&lin=f&keep=1&srchmode=1&unlock
212	Aconitum uchiyamai	Nakai	1	32		http://www.worldfloraonline.org/taxon/wfo-0000518231
213	Aconitum umbrosum	(Korsh) Kom	1	16		https://www.ncbi.nlm.nih.gov/Taxonomy/Browser/wwwtax.cgi?mode=Info&id=1045226&lvl=3&lin=f&keep=1&srchmode=1&unlock
214	Aconitum uncinatum	L	1	16		http://www.worldfloraonline.org/taxon/wfo-0000518235
215	Aconitum variegatum	L	1	16, 17, 24	Unclear	https://www.ncbi.nlm.nih.gov/Taxonomy/Browser/wwwtax.cgi?mode=Info&id=112594&lvl=3&lin=f&keep=1&srchmode=1&unlock	http://www.phytomorphology.org/aconitum-variegatum/
216	Aconitum villosum	Rchb	1	16,32		https://www.ncbi.nlm.nih.gov/Taxonomy/Browser/wwwtax.cgi?mode=Info&id=50884&lvl=3&lin=f&keep=1&srchmode=1&unlock
217	Aconitum vilmorinianum	Kom; var. patentipilum	1	16		https://www.ncbi.nlm.nih.gov/Taxonomy/Browser/wwwtax.cgi?mode=Tree&id=226101&lvl=3&lin=f&keep=1&srchmode=1&unlock
218	Aconitum violaceum	Jacquem ex Stapf; var. weileri	2	16	Vulnerable	https://www.ncbi.nlm.nih.gov/Taxonomy/Browser/wwwtax.cgi?mode=Tree&id=279771&lvl=3&lin=f&keep=1&srchmode=1&unlock
219	Aconitum volubile	Pall ex Koelle; var pubescens Regel; var. latisectum	3	16, 24, 32, 64		https://www.ncbi.nlm.nih.gov/Taxonomy/Browser/wwwtax.cgi?mode=Tree&id=85361&lvl=3&lin=f&keep=1&srchmode=1&unlock
220	Aconitum vulparia	Rchb	1	16		https://www.ncbi.nlm.nih.gov/Taxonomy/Browser/wwwtax.cgi?mode=Info&id=516012&lvl=3&lin=f&keep=1&srchmode=1&unlock
221	Aconitum wangii	Q E Yang	1	16		http://www.worldfloraonline.org/taxon/wfo-0001224524
222	Aconitum wangyedianense	Y.Z.Zhao	1			https://www.ncbi.nlm.nih.gov/Taxonomy/Browser/wwwtax.cgi?mode=Info&id=1960963&lvl=3&lin=f&keep=1&srchmode=1&unlock
223	Aconitum wumengense	J.He & E.D.Liu	1			https://www.ncbi.nlm.nih.gov/Taxonomy/Browser/wwwtax.cgi?mode=Info&id=49190&lvl=3&lin=f&keep=1&srchmode=1&unlock
224	Aconitum yamazakii	Tamura & Namba	1	16		https://www.ncbi.nlm.nih.gov/Taxonomy/Browser/wwwtax.cgi?mode=Info&id=49190&lvl=3&lin=f&keep=1&srchmode=1&unlock
225	Aconitum yuparense	Takeda; var apoiense (Nakai) Kadota; var. yuparense	2	16		https://www.ncbi.nlm.nih.gov/Taxonomy/Browser/wwwtax.cgi?mode=Tree&id=49286&lvl=3&lin=f&keep=1&srchmode=1&unlock
226	Aconitum zigzag	H Lev & Vaniot; kishidae (Nakai) Kadota	2	16, 32 ,40		https://www.ncbi.nlm.nih.gov/Taxonomy/Browser/wwwtax.cgi?mode=Tree&id=2152794&lvl=3&lin=f&keep=1&srchmode=1&unlock
227	Aconitum zuccarinii	Nakai	1	32		http://www.worldfloraonline.org/taxon/wfo-0000518392
