# Supplementary material for: The known, unknown, and the intriguing about members of a critically endangered traditional medicinal plant genus Aconitum
Source: Front Plant Sci. 2023 Jul 28;14:1139215. doi: 10.3389/fpls.2023.1139215 (PMC10421671; doi:10.3389/fpls.2023.1139215)
Supplement: Supplementary File 2 — Classification of genus Aconitum into its respective taxa, i.e., subgenus, section, and series, along with their known representative members, general characteristics, secreted phytochemicals, toxicity, and usage information. [file Table_2.xlsx]

## Sheet: Table S2
Classification of Aconitum spp.
Genus	Subgenus	Section	Series	Species	General characteristic	Phytochemicals present	Toxicity	Pharmacological uses
Genus Aconitum	Subgenus Aconitum	Sect. Aconitum	Ser. Volubilia	A. monanthum	Twinning stems.	Contains aconitine type diester C19-diterpenoid alkaloid	LD50 mice = 84-283mg/kg	Roots used in treatment of trauma and rheumatic pain
				A. volubile
				A. carmichaeli
				A. hemsleyanum
				A. cannabifolium
				A. tsaii
				A. sungpanense
				A. sungpanense var. leucanthum
				A. campylorrhynchum
				A. henryi
				A. bulbilliferum
				A. episcopale
				A. austroyunnanense
				A. vilmorinianum
				A. austroyunnanense
				A. stapfianum
			Ser. Volubilia (Inflata)	A. carmichaeli	NA	Contain the highly advanced chemical constituents in the Aconitum genus, 15-hydroxyl monoester or diester C-19 diterpenoid alkaloids	LD50 mice = 66-137 mg/kg	cardiovascular, muscle smoothing and central effects
				A. kusnezoffii
			Ser. Grandituberosa	A. nemorum	Includes A. nemorum, A. karakolicum, A. talassicum.	Highly advanced aconitine-type C-19 diterpenoid alkaloids	Have high toxicity LD50 mice = 29 mg/kg
				A. karakolicum
				A. talassicum
			Ser. Racemulosa	A. racemulosum	Includes only A. racemulosum var. pengzhouense.	Mainly lycoctonine type and the aconitine type amino alcohol C19 diterpenoid and C20 diterpenoid alkaloid. Novel skeleton of C20-diterpenoid alkaloid, racemulosine found.		Activates blood circulation and removing stasis
			Ser. Rotundifolia	A. pulchellum	Dwarf alpine plants, less than 35cm tall.	Contain mainly lactone type C-19 diterpenoid alkaloid and in some cases C-20 diterpenoid alkaloid	Lower toxicity (LD50 mice = 2400mg/kg)	Treatment of high fever
				A. hamatipetalum
				A. naviculare
			Ser. Brachypoda	A. pendulum	It also includes A. brachypodum, A. polyschistum, A. coreanum, A. anthoroideum, etc.	Includes mainly aconitine type C-19 diterpenoid alkaloids. A. coreanum has mainly C-20 diterpenoid alkaloids	LD50 mice = 130-280mg/kg A. coreanum LD50 mice = 2800mg/kg	Anti-rheumatic, analgesic
				A. sessiliflorum
				A. ludlowii
			Ser. Ambigua	A. piepunense	NA	Mainly contain Aconitine type C-19 diterpenoid alkaloids, with anisoyloxy residues.
				A. kongboense
				A. chienningense
				A. refractum
			Ser. Stylosa	A. transsectum	Larger roots. Includes A. rockii too.	Mainly includes aconitine type C-19 alkaloids (characterised by presence of anisoyloxy residues at C-14)	High toxicity (LD50 mice = 24-102mg/kg)	Major sources of “Da-wu-tou”
				A. bulleyanum
				A. tatsienense
				A. franchetii
				A. contortum
			Ser. Bullatifolia	A. hicksii.	Petals glabrous; lip slightly concave at apex, Stamens glabrous. 5 Carpels, yellow pubescent	C-20 diterpenoid alkaloids: Denudatine type and napelline type. C-19 diterpenoid alkaloid: Aconitine type	LD50 mice = 210-270mg/kg	Pains and rheumatism
			Ser. Brunnea	A. brunneum	Intermediate position between the series Bullatifolia and Brachypoda because of the types of phytochemicals present	Contains highly advanced aconitine type alkaloids and both C20-diterpenoid alkaloids ex. Denudatine and songorine
			Ser. Tangutica	A. spiripetalum	Dwarf alpine plants, less than 35cm tall.	Contain mainly lactone type C-19 diterpenoid alkaloid and in some cases C-20 diterpenoid alkaloid	Lower toxicity (LD50 mice = 2400mg/kg)	Treatment of high fever
				A. tanguticum
		Sect. Sinaconitum	Ser. Sinaconitum	A. polycarpum
		No Section	No Series	A. ferox
				A. rockii
				A. liljestrandii
				A. franchetii
				A. ciliare
				A. chienningense
				A. forrestii var. albovillosum
				A. pulchellum
				A. hemsleyanum
				A. tanguticum
				A. baicalense
				A. pendulum
				A. delphiniifolium
				A. sessiliflorum
				A. pentheri
				A. racemulosum
	Subgenus Lycoctonum	Sect. Lycoctonum	Ser. Lycoctonia	A. angustius	C18 diterpenoid alkaloids of ranaconine and lappaconine types C19 diterpenoid alkaloids of the lycoctonine type	C18 diterpenoid alkaloids of ranaconine and lappaconine types C19 diterpenoid alkaloids of the lycoctonine type	lower toxicity (LD50 in mice: 1660-3340 mg/kg)	Used in the treatment of irregular menstruation and rheumatism
				A. sinomontanum
				A. lycoctonum
				A. shennongjiaense
				A. septentrionale
				A. moldavicum
				A. orientale
				A. leucostomum var. leucostomum
				A. vulparia
				A. ranunculifolium
				A. pauciflorum
				A. leucostomum var. hopeiense
				A. sajanense
				A. laeve
				A. lasiostomum
				A. wangyedianense
			Ser. Scaposa	A. scaposum
			Ser. Volubilia	A. alboviolaceum
				A. longecassidatum
				A. finetianum
				A. pseudolaeve
				A. quelpaertense
				A. angustius
				A. barbatum var. barbatum
				A. gigas var. hondoense CP
				A. loczyanum
				A. pterocaule
				A. desoulavyi
			Ser. Longicassidata	A. barbatum
				A. barbatum var puberulum
				A. gigas var. hondoense NR
				A. ajanense
				A. umbrosum
				A. reclinatum
				A. ranunculoides
				A. sukaczevii
				A. monticola
				A. krylovii
			Ser. Crassiflora	A. chrysotrichum
				A. crassiflorum
				A. brevicalcaratum var. brevicalcaratum
				A. brevicalcaratum var. parviflorum
				A. rilongense
